# Supplementary material for: Dietary Patterns of Adolescents from the Chilean Growth and Obesity Cohort Study Indicate Poor Dietary Quality
Source: MDPI journal article supplement (doi:10.3390/nu12072083), 2020-07-14
Supplement: s1 [file s1]

## Supplemental Files

**Table S1.** Description of the foods that composed each of the 29 food groups included in the factor analysis. GOCS Study, Chile 2014–2015.

| Food Groups                  | Food Composition                                                                                                                                                                                                                                                                                                                                                                  |
|------------------------------|-----------------------------------------------------------------------------------------------------------------------------------------------------------------------------------------------------------------------------------------------------------------------------------------------------------------------------------------------------------------------------------|
| Milk                         | Fluid whole milk (3% fat), whole milk powder, reduced fat milk (2% fat), skim milk, skim milk powder                                                                                                                                                                                                                                                                              |
| Flavored milk                | Mixtures and milk drinks, strawberry, chocolate and other flavors, purchased ready-to-drink                                                                                                                                                                                                                                                                                       |
| Yogurts                      | Yogurt, fermented milk                                                                                                                                                                                                                                                                                                                                                            |
| Cheeses                      | Gouda cheese, ricotta cheese, cream cheese, cheddar cheese,                                                                                                                                                                                                                                                                                                                       |
| Meat                         | Steak beef, ground beef, beef ribs, pork chop, pork ribs, pork loin, poultry, chicken, turkey, fish, viscera (all cooking methods)                                                                                                                                                                                                                                                |
| Cold cuts                    | Ham, bologna, turkey breast, chicken breast, salami                                                                                                                                                                                                                                                                                                                               |
| Processed meats              | Sausage, sausages, frankfurters, meatballs ready for consumption, nuggets, hamburger ready for consumption (only meat).                                                                                                                                                                                                                                                           |
| Junk food                    | Pizzas, sandwiches of meat or hamburger ready to eat, french fries, wonton, egg roll, chilean hot dog, <i>sopaipillas</i> , <i>tacos</i> , <i>empanadas</i> . Mainly, street food or fast food                                                                                                                                                                                    |
| Sweetened beverages          | Juice or flavored drink, purchased ready-to-drink, juice or flavored drink, dry mix - unprepared                                                                                                                                                                                                                                                                                  |
| Soft drinks                  | Soda pop or soft drink regular or diet                                                                                                                                                                                                                                                                                                                                            |
| Coffee and tea               | Coffee, instant coffee, herbal tea, tea bag                                                                                                                                                                                                                                                                                                                                       |
| Bread                        | French bread, bun bread, white bread with salt                                                                                                                                                                                                                                                                                                                                    |
| Ready to eat cereal          | Breakfast cereals                                                                                                                                                                                                                                                                                                                                                                 |
| Rice, potato and pasta       | Rice, cooked potatoes, mashed potatoes, pasta and dishes pasta.                                                                                                                                                                                                                                                                                                                   |
| Vegetables                   | Lettuce, cabbage, raw salad, others load vegetables. Pumpkin, carrot, cucumber, tomato, among others.                                                                                                                                                                                                                                                                             |
| Fruits                       | Pineapple, banana, orange, apple, pear, papaya, mango, watermelon, tangerine, grape, blueberry, strawberry, blackberry, fruit salad, fruit juices                                                                                                                                                                                                                                 |
| Eggs                         | Fried eggs, scrambled eggs, omelet, boiled eggs, egg white, egg yolk                                                                                                                                                                                                                                                                                                              |
| Homemade dishes              | Typical chilean food or meals prepared at home, restaurants or schools; that require a longer preparation time and made with natural foods. For instance: Beans, lentils, chickpeas, white beans, legumes-based preparations, vegetables stews with or without meat, <i>cazuela</i> , <i>charquican</i> , <i>chapsui</i> , <i>humitas</i> , <i>pastel de choclo</i> among others. |
| Soup                         | Dry soup, bouillon, consommé.                                                                                                                                                                                                                                                                                                                                                     |
| Cracker and salt snack       | Crackers, saltine or soda, salty chips - snack type, cheese balls, puffs or twists, potato chips                                                                                                                                                                                                                                                                                  |
| Chocolates and confectionary | Chocolate candy, chocolate candy bar, sweets based on milk, lollipop, candy, caramel, jams, <i>dulce de leche</i>                                                                                                                                                                                                                                                                 |

|                                       |                                                                                                                            |
|---------------------------------------|----------------------------------------------------------------------------------------------------------------------------|
| Cookies                               | Cookies and bars, granola bars, sweet biscuit and cookie stuffed, cookie sandwich, cookies commercial packaged             |
| Cake                                  | Cakes, cheesecake, cake sponge, doughnut, muffins, pies fruit, cupcake, cake purchased ready-to-eat                        |
| Desserts and ice cream                | Pudding, flan, mousse, gelatin dessert, chilean desserts, fruit canned with syrup, ice cream and frozen desserts, Popsicle |
| Sugar                                 | White sugar                                                                                                                |
| Chocolate powder                      | Cocoa powder, chocolate powder                                                                                             |
| Butter and margarine                  | Salted butter, unsalted butter, salted margarine, unsalted margarine, light margarine                                      |
| Oil, lemon, salt, vinegar (for salad) | Soybean oil, sunflower oil, vegetal oil, olive oil, salt, vinegar, lemon juice to salad                                    |
| Mayonnaise, ketchup                   | Mayonnaise or mayo type dressing, ketchup, mustard, soy sauce                                                              |
